# Supplementary material for: Photocatalytic activity of Ni0.5Zn0.5Fe2O4@polyaniline decorated BiOCl for azo dye degradation under visible light – integrated role and degradation kinetics interpretation
Source: Royal Society of Chemistry journal article supplement (doi:10.1039/c9ra00548j), 2019-01-01
Supplement: c9ra00548j1.pdf [file c9ra00548j1.pdf]

# SUPPORTING INFORMATION

## **Photocatalytic Activity of $\text{Ni}_{0.5}\text{Zn}_{0.5}\text{Fe}_2\text{O}_4$ @Polyaniline decorated BiOCl for Azo dye degradation under visible light - Integrated role and Degradation Kinetics Interpretation**

**Ruchika Tanwar and Uttam Kumar Mandal \***

University School of Chemical Technology, G.G.S. Indraprastha University, Sector 16  
C, Dwarka, New Delhi-110078, India

Email Address: [uttammandal@ipu.ac.in](mailto:uttammandal@ipu.ac.in)

**Chemicals:** All chemicals were of analytical grade and used as received. Bismuth oxide ( $\text{Bi}_2\text{O}_3$ ), aniline (ANI) monomer, sodium borohydride ( $\text{NaBH}_4$ ), methyl orange (MO, Table 1) were purchased from Sigma-Aldrich, USA. Ammonium persulphate (AMPS), sodium hypochlorite ( $\text{NaOCl}$ ), nickel chloride hexahydrated ( $\text{NiCl}_2 \cdot 6\text{H}_2\text{O}$ ), zinc chloride ( $\text{ZnCl}_2$ ), anhydrous ferric chloride ( $\text{FeCl}_3$ ) and ethanol ( $\text{C}_2\text{H}_5\text{OH}$ ) were procured from Merck, Germany.  $\text{NaOH}$ ,  $\text{HCl}$ ,  $\text{TiO}_2$ , methanol, tetrahydrofuran and ammonia solution were provided by SRL Pvt. Ltd., India. Double distilled water was used for preparation of all aqueous solution.

**Synthesis of  $\text{Ni}_{0.5}\text{Zn}_{0.5}\text{Fe}_2\text{O}_4$ @Polyaniline nanofibers (N@PAni):** The  $\text{Ni}_{0.5}\text{Zn}_{0.5}\text{Fe}_2\text{O}_4$  nanocrystals (NZF) were prepared according to our earlier report.<sup>1</sup> Briefly a stoichiometric quantity of nickel chloride, zinc chloride and ferric chloride was dissolved in deionised water homogeneously. Then this solution was poured into boiling  $\text{NaOH}$  under stirring. The resultant mixture was kept at  $80^\circ\text{C}$  for 4 h. The obtained precipitates were washed several times with distilled water and methanol followed by vacuum drying at  $100^\circ\text{C}$  for 24 hr.

The  $\text{Ni}_{0.5}\text{Zn}_{0.5}\text{Fe}_2\text{O}_4$  @ Polyaniline (N@PAni) nanofibers were prepared by an in situ polymerization method.<sup>2</sup> NZF nanocrystals and ammonium peroxydisulfate were dispersed in 100 ml of 1mol/l  $\text{HCl}$  aqueous solution with ultrasonic vibrations for 30 min to obtain a uniform suspension. Aniline was added into this mixture dropwise under shaking, after which, the resulting mixture was allowed to polymerize under shaking for 1 h. Finally the N@PAni nanofibers were filtered out and washed with a large amount of deionized water, and then dried at  $60^\circ\text{C}$  until a constant mass reached.

**Synthesis of  $\text{BiOCl}$ :**  $\text{BiOCl}$  powder was prepared by a facile hydrolysis method.<sup>3</sup> About 2 gm of  $\text{Bi}_2\text{O}_3$  was completely dissolved in concentrated hydrochloric acid solution. The white colloidal solution was obtained by adding aqueous ammonia solution into the above acidic solution to adjust pH value between 2 and 3. The colloidal solution was then heated at  $40^\circ\text{C}$  for half an hour. White plates like precipitates of  $\text{BiOCl}$  were obtained. The precipitates were centrifuged and washed several times with ethanol and double distilled water. Finally, product was dried at  $80^\circ\text{C}$  for 6 h in air oven.

**Characterization Techniques:** X-ray diffraction patterns were identified on a Rigaku Ultima IV, X-ray diffractometer equipped with  $\text{Cu K}\alpha$  radiation. Fourier Transform Infrared (FTIR) spectra (KBr) were recorded on 3000 Hyperion Microscope with Vertex 80, FTIR spectrophotometer in the range  $4000\text{--}400\text{ cm}^{-1}$  with  $1\text{ cm}^{-1}$  resolution. The high resolution transmission electron microscopy (HRTEM) images were recorded on a model JEOL JEM 2100F combined with energy dispersive X-ray (EDS) spectroscopy. Solid UV-Vis diffuse-reflectance spectra were obtained on a Varian Cary 5000 UV-visible spectrophotometer. X-ray photoelectron spectra (XPS) was used to characterize

surface elemental compositions and performed on an Escalab 210 X-ray photoelectron spectroscope using Al K $\alpha$  x-ray source. Photoluminescence (PL) spectra were recorded on an F-4600 fluorescence spectrophotometer with an excitation wavelength of 290 nm. To measure photocatalytic activity and optical absorbance of dye solutions, Hitachi U-2900UV-vis spectrophotometer was used. TOC was measured on TOC analyzer (Shimadzu). Finally, intermediate products resulting from the photocatalytic degradation of dye were identified using GCMS technique. GC/MS analysis was performed at 70 eV on a QP 2010 Ultra-GCMS along with fused capillary column. A temperature gradient was used in the GC separations. The initial temperature was 60°C and it was increased to 360 °C at a rate of 6 °C/min. An electrochemical system (SI 6143 Instrument) was employed to measure the EIS. EIS was performed from 0.1Hz to 100 kHz at an open circuit potential of 0.3 V and an alternating current (AC) voltage amplitude of 5 mV.

**Adsorption and Photocatalytic experiments:** Experiments were carried out in a constant stirred cylindrical shaped photocatalytic quartz reactor at room temperature. A suspension of 0.20 g of catalyst in 200 ml of an aqueous solution of MO dye (10 mg/l) was magnetically stirred in dark for 1 hour to establish an adsorption-desorption equilibrium. Then solution was exposed to visible light (500 W halogen lamp, Philips India) located 20 cm away from the reaction solution. At specific time intervals, 4 ml aliquots were withdrawn and centrifuged at 12000 rpm for 5 min to separate the photocatalyst powder. The residual dye concentration in supernant was determined from the absorption band at  $\lambda_{\text{max}} = 464$  nm (MO) using Hitachi UV-vis spectrophotometer. For adsorption measurements, the adsorption rate was calculated as

$$\text{Adsorption rate} = (a_0 - a)/a_0 \times 100 \% \quad (\text{S1})$$

where,  $a_0$  and  $a$  are the absorbance values of dyes initially and after 1 hr, respectively.

The degradation efficiency was calculated using the following equation:

$$\text{DE } (\eta \%) = (A_0 - A) / A_0 \times 100 \% \quad (\text{S2})$$

where,  $A_0$  and  $A$  are the absorbance values of dyes initially and after time  $t$  (min) of visible light irradiation, respectively.

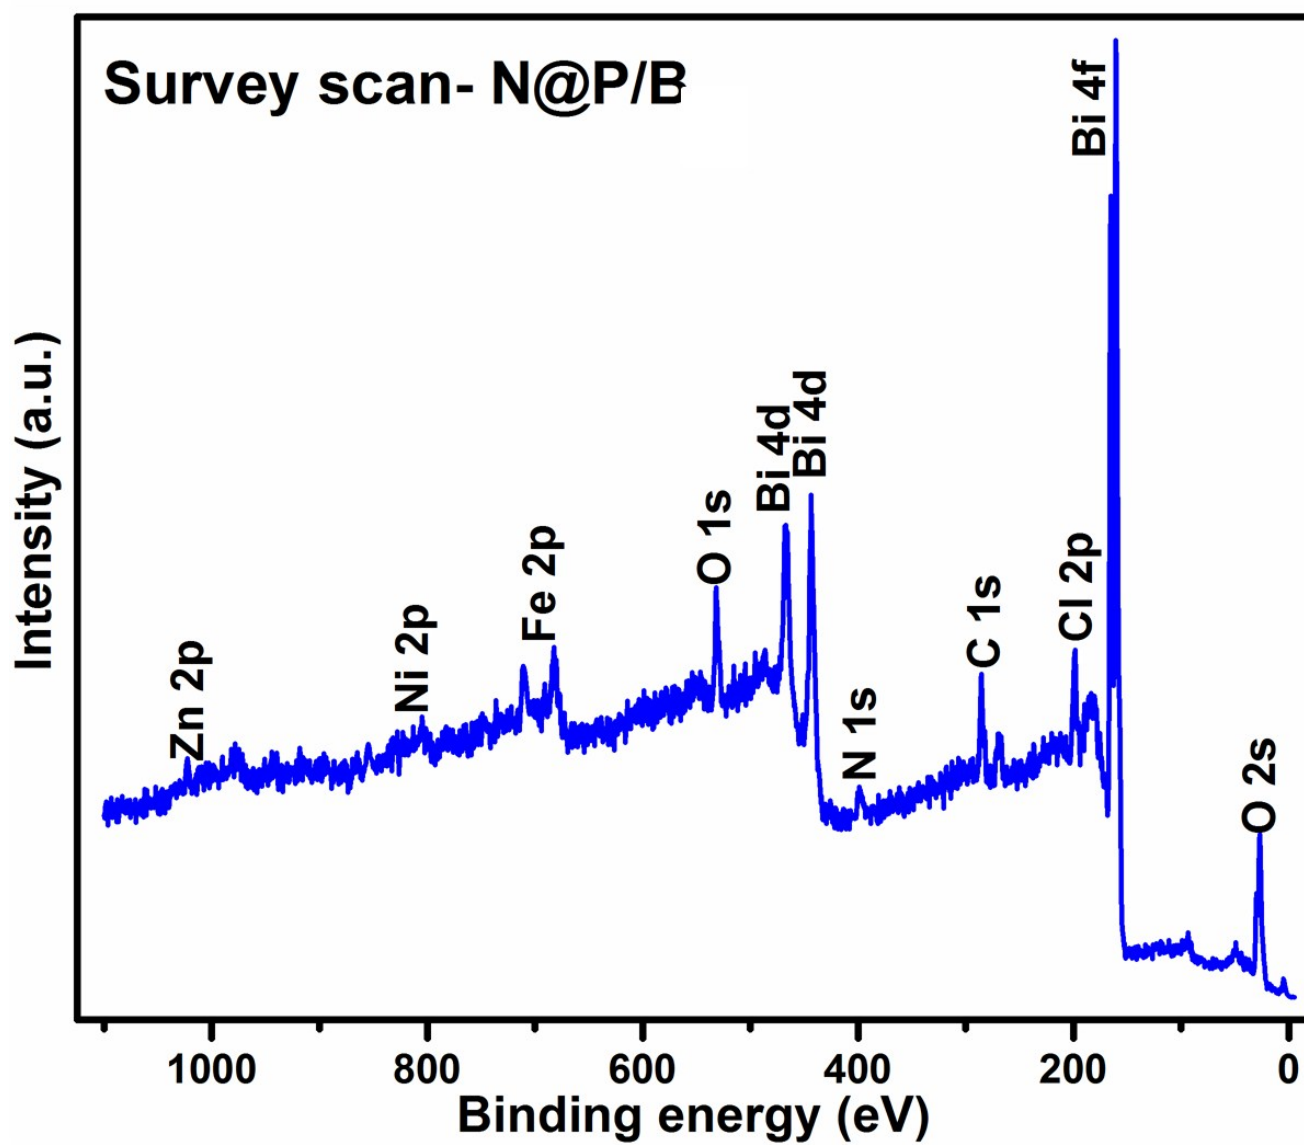

Figure S1. Survey spectrum of N@P/B

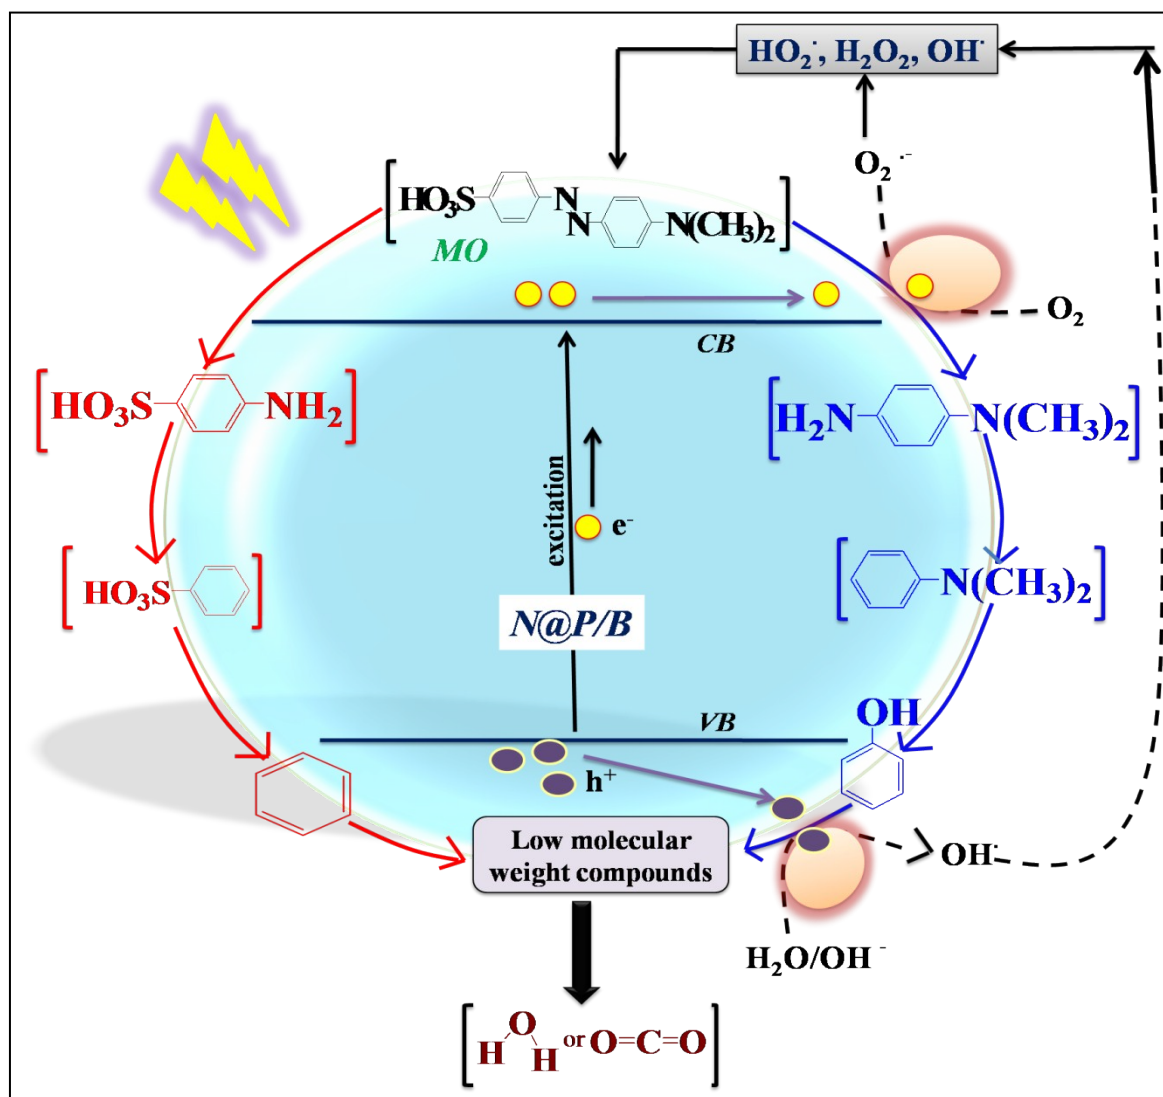

**Scheme S1. Degradation mechanism of dye/ its intermediates**

## References

- 1) S. Kumar, V. Singh, S. Aggarwal, U. K. Mandal, R.K. Kotnala, *J. Phys. Chem. C*, **2010**, 114, 6272-6280.
- 2) A. Rahy, M. Sakrout, S. Manohar, S.J. Cho, J. Ferraris, D.J. Yang, *Chem. Mater.*, **2008**, 20, 4808-4814.
- 3) R. Tanwar, S. Kumar and U. K. Mandal, *J. Photochem. Photobio. A: Chem.*, **2017**, 333, 105-116.
